# Supplementary material for: Interparental Relationship Satisfaction from Nine Months to Nine Years and Children’s Socioemotional Competencies at Nine Years
Source: Springer Nature journal article supplement (doi:10.1007/s10826-023-02601-4), 2023-06-02
Supplement: MOESM1 [file 25437414]

**Appendix A**

**Table 1**

*Bivariate Correlations between Mothers’ Interparental Relationship Satisfaction from Nine Months to Nine Years and Socioemotional Competencies in Female Children at Nine Years.*

|  |  | 1 | 2 | 3 | 4 | 5 | 6 | 7 | 8 | 9 |
| --- | --- | --- | --- | --- | --- | --- | --- | --- | --- | --- |
| 1 | Relationship satisfaction (9 months) | - |  |  |  |  |  |  |  |  |
| 2 | Relationship satisfaction (9 years) | .22** | - |  |  |  |  |  |  |  |
| 3 | Change in relationship satisfaction | -.83** | .35** | - |  |  |  |  |  |  |
| 4 | Emotional | -.01 | -.11** | -0.5 | - |  |  |  |  |  |
| 5 | Conduct | -.07 | -.10** | .001 | .24** | - |  |  |  |  |
| 6 | Hyperactivity | -.07 | -.07* | .02 | .35** | .51** | - |  |  |  |
| 7 | Peer problems | -.03 | -.13** | -.05 | .46** | .38** | .39** | - |  |  |
| 8 | Prosocial behaviour | .04 | .09** | .01 | -.28** | -.48** | -.44* | -.47** | - |  |
| 9 | Total difficulties | -.05 | -.13** | -.02 | .73** | .65** | .82** | .73** | -.55* | - |

**Table 2**

*Bivariate Correlations between Mothers’ Interparental Relationship Satisfaction from Nine Months to Nine Years and Socioemotional Competencies in Male Children at Nine Years.*

|  |  | 1 | 2 | 3 | 4 | 5 | 6 | 7 | 8 | 9 |
| --- | --- | --- | --- | --- | --- | --- | --- | --- | --- | --- |
| 1 | Relationship satisfaction (9 months) | - |  |  |  |  |  |  |  |  |
| 2 | Relationship satisfaction (9 years) | .24** | - |  |  |  |  |  |  |  |
| 3 | Change in relationship satisfaction | -.83** | .34** | - |  |  |  |  |  |  |
| 4 | Emotional | -.02 | .03 | -.04 | - |  |  |  |  |  |
| 5 | Conduct | -.01 | -.04 | -.01 | .14** | - |  |  |  |  |
| 6 | Hyperactivity | -.06* | -.05 | .03 | .29** | .47** | - |  |  |  |
| 7 | Peer problems | .04 | -.01 | -.05 | .35** | .31** | .34** | - |  |  |
| 8 | Prosocial behaviour | .05 | .06* | -.02 | -.15** | -.53** | -.44** | -.42** | - |  |
| 9 | Total difficulties | -.03 | -.03 | .01 | .64** | .63** | .83** | .66** | -.53** | - |

**Table 3**

*Bivariate Correlations between Fathers’ Interparental Relationship Satisfaction from Nine Months to Nine Years and Socioemotional Competencies in Female Children at Nine Years.*

|  |  | 1 | 2 | 3 | 4 | 5 | 6 | 7 | 8 | 9 |
| --- | --- | --- | --- | --- | --- | --- | --- | --- | --- | --- |
| 1 | Relationship satisfaction (9 months) | - |  |  |  |  |  |  |  |  |
| 2 | Relationship satisfaction (9 years) | .21** | - |  |  |  |  |  |  |  |
| 3 | Change in relationship satisfaction | -.8** | .42** | - |  |  |  |  |  |  |
| 4 | Emotional | -.002 | -.06 | -.03 | - |  |  |  |  |  |
| 5 | Conduct | -.03 | .02 | .03 | .24** | - |  |  |  |  |
| 6 | Hyperactivity | -.04 | -.03 | .01 | .35** | .51** | - |  |  |  |
| 7 | Peer problems | -.01 | -.04 | .01 | .46** | .38** | .39** | - |  |  |
| 8 | Prosocial behaviour | .04 | .05 | -.04 | -.28** | -.48** | -.44* | -.47** | - |  |
| 9 | Total difficulties | -.03 | -.05 | .001 | .73** | .65** | .82** | .73** | -.55* | - |

**Table 4**

*Bivariate Correlations between Fathers’ Interparental Relationship Satisfaction from Nine Months to Nine Years and Socioemotional Competencies in Male Children at Nine Years.*

|  |  | 1 | 2 | 3 | 4 | 5 | 6 | 7 | 8 | 9 |
| --- | --- | --- | --- | --- | --- | --- | --- | --- | --- | --- |
| 1 | Relationship satisfaction (9 months) | - |  |  |  |  |  |  |  |  |
| 2 | Relationship satisfaction (9 years) | .30** | - |  |  |  |  |  |  |  |
| 3 | Change in relationship satisfaction | -.79** | .34** | - |  |  |  |  |  |  |
| 4 | Emotional | -.06 | -.04 | .01 | - |  |  |  |  |  |
| 5 | Conduct | -.06 | -.06 | -.01 | .14** | - |  |  |  |  |
| 6 | Hyperactivity | -.1** | -.03 | .08* | .29** | .47** | - |  |  |  |
| 7 | Peer problems | .01 | .003 | -.01 | .35** | .31** | .34** | - |  |  |
| 8 | Prosocial behaviour | .05 | .1** | -.01 | -.15** | -.53** | -.44** | -.42** | - |  |
| 9 | Total difficulties | -.08* | -.04 | .04 | .64** | .63** | .83** | .66** | -.53** | - |
